# Supplementary material for: Effects of Hormone Therapy on Heart Fat and Coronary Artery Calcification Progression: Secondary Analysis From the KEEPS Trial
Source: PubMed Central journal article supplement — J Am Heart Assoc. 2019 Aug 1;8(15):e012763. doi: 10.1161/JAHA.119.012763 (PMC6761637; doi:10.1161/jaha.119.012763), 2019-08-01
Supplement: JAH3-8-e012763-s001.pdf [file JAH3-8-e012763-s001.pdf]

# **SUPPLEMENTAL MATERIAL**

**Table S1. Baseline variables and CAC progression for women included and excluded from the analytical sample.**

| <b>Variables*</b>                          | <b>Included<br/>N=474</b> | <b>Excluded<br/>N=253</b> | <b>P value †</b> |
|--------------------------------------------|---------------------------|---------------------------|------------------|
| <b>Age at baseline, mean (SD), Yr</b>      | 52.7 (2.6)                | 52.7 (2.5)                | 0.70             |
| <b>Age at menopause, mean (SD), Yr</b>     | 50.9 (2.6)                | 50.8 (2.6)                | 0.79             |
| <b>Time since menopause, mean (SD), Yr</b> | 1.8 (0.8)                 | 1.9 (0.8)                 | 0.03             |
| <b>White Race, N (%)</b>                   | 370 (78.1)                | 187 (73.9)                | 0.21             |
| <b>Education, N (%)</b>                    |                           |                           | 0.01             |
| Declined to Answer                         | 5 (1.1)                   | 5 (2.0)                   |                  |
| High School graduate or less               | 29 (6.1)                  | 29 (11.5)                 |                  |
| Some college                               | 80 (16.9)                 | 52 (20.6)                 |                  |
| College graduate                           | 360 (75.9)                | 167 (66.0)                |                  |
| <b>Employed, N (%)</b>                     | 391 (82.5)                | 201 (79.4)                | 0.31             |
| <b>Income, N (%)</b>                       |                           |                           | 0.47             |
| <\$60K                                     | 84 (17.7)                 | 55 (21.7)                 |                  |
| \$60K-<\$100K                              | 65 (13.7)                 | 36 (14.2)                 |                  |
| >\$100K                                    | 85 (17.9)                 | 37 (14.6)                 |                  |

|                                                           |                  |                  |      |
|-----------------------------------------------------------|------------------|------------------|------|
| Unknown                                                   | 240 (50.6)       | 125 (49.4)       |      |
| <b>Physical activity level, median(Q1, Q3), MET-hr/wk</b> | 16.7 (7.0, 28.6) | 17.5 (7.5, 28.3) | 0.84 |
| <b>Alcohol consumption, N (%)</b>                         | 361 (76.2)       | 176 (69.6)       | 0.05 |
| <b>Smoking Status, N (%)</b>                              |                  |                  | 0.03 |
| Never                                                     | 380 (80.2)       | 191 (75.5)       |      |
| Past                                                      | 70 (14.8)        | 36 (14.2)        |      |
| Current                                                   | 24 (5.1)         | 26 (10.3)        |      |
| <b>Ever use hormone therapy, N (%)</b>                    | 100 (21.1)       | 52 (20.6)        | 0.86 |
| <b>Anti-Hypertensive medication use, N (%)</b>            |                  |                  | 0.29 |
| Never                                                     | 392 (82.7)       | 220 (87.0)       |      |
| Past                                                      | 26 (5.5)         | 12 (4.7)         |      |
| Current                                                   | 56 (11.8)        | 21 (8.3)         |      |
| <b>BMI, mean (SD), Kg/m<sup>2</sup></b>                   | 26.0 (4.3)       | 26.5 (4.4)       | 0.20 |
| <b>Waist circumference, mean (SD), cm</b>                 | 84.4 (11.70)     | 84.3 (11.7)      | 0.92 |
| <b>Systolic blood pressure, mean (SD), mmHg</b>           | 118.4 (15.1)     | 119.6 (14.5)     | 0.29 |
| <b>HDL cholesterol, mean (SD), mg/dL</b>                  | 72.2 (15.0)      | 71.7 (13.8)      | 0.68 |
| <b>LDL cholesterol, mean (SD), mg/dL</b>                  | 111.4 (27.5)     | 110.1 (28.4)     | 0.56 |

|                                                       |                   |                   |        |
|-------------------------------------------------------|-------------------|-------------------|--------|
| <b>Fasting glucose, median (Q1, Q3), mg/dL</b>        | 78.5 (74.0, 85.5) | 78.0 (73.0, 84.0) | 0.32   |
| <b>Insulin, median (Q1, Q3), <math>\mu</math>U/mL</b> | 4.2 (2.0, 7.4)    | 4.4 (2.10, 7.2)   | 0.75   |
| <b>HOMA, median (Q1, Q3)</b>                          | 0.8 (0.3, 1.5)    | 0.8 (0.4 1.4)     | 0.88   |
| <b>EAT volume, median (Q1, Q3), cm<sup>3</sup></b>    | 36.8 (25.6, 54.5) | 38.9 (27.7, 53.0) | 0.50   |
| <b>PAT volume, median (Q1, Q3), cm<sup>3</sup></b>    | 14.5 (10.2, 21.3) | 6.5 (3.2, 11.8)   | <0.001 |
| <b>CAC Agatston score, median (Q1, Q2)</b>            | 0.0 (0.0, 0.0)    | 0.0 (0.0, 0.0)    | 0.24   |
| <b>Any CAC (CAC&gt;0), N (%)</b>                      | 55 (11.6)         | 37 (14.6)         | 0.24   |
| <b>CAC progression, N (%)</b>                         | 66 (13.9)         | 13 (13.5)         | 0.92   |
| <b>Treatment groups, N (%)</b>                        |                   |                   | 0.44   |
| o-CEE                                                 | 143 (30.2)        | 87 (34.4)         |        |
| t-E2                                                  | 145 (30.6)        | 77 (30.4)         |        |
| Placebo                                               | 186 (39.2)        | 89 (35.2)         |        |

CAC: coronary artery calcification; MET: metabolic equivalents; BMI: body mass index; HDL: high density lipoprotein; LDL: low density lipoprotein; HOMA: Homeostasis Model Assessment insulin resistance index EAT: epicardial adipose tissue; PAT: paracardial adipose tissue; o-CEE: oral conjugated equine estrogen; t-E2: transdermal 17 $\beta$ -estradiol;

\* Baseline levels presented unless otherwise specified

† Chi-square test for categorical variables; ANOVA or Wilcoxon Mann Whitney tests for continuous variables as appropriate

**Table S2. Baseline Study variables by 48-month CAC progression.**

| Variables *                                | 48-month CAC progression |                     | P value † |
|--------------------------------------------|--------------------------|---------------------|-----------|
|                                            | Yes<br>N=66 (13.9%)      | No<br>N=408 (86.1%) |           |
| <b>Age at baseline, mean (SD), Yr</b>      | 52.76 (2.73)             | 52.63 (2.55)        | 0.70      |
| <b>Age at menopause, mean (SD), Yr</b>     | 50.80 (2.70)             | 50.89 (2.55)        | 0.79      |
| <b>Time since menopause, mean (SD), Yr</b> | 1.95 (0.82)              | 1.73 (0.77)         | 0.03      |
| <b>White Race, N (%)</b>                   | 54 (81.8)                | 316 (77.5)          | 0.43      |
| <b>Education, N (%)</b>                    |                          |                     | 0.01      |
| Declined to Answer                         | 0 (0.0)                  | 5 (1.2)             |           |
| High School graduate or less               | 10 (15.2)                | 19 (4.7)            |           |
| Some college                               | 14 (21.2)                | 66 (16.2)           |           |
| College graduate                           | 42 (63.6)                | 318 (77.9)          |           |
| <b>Employed, N (%)</b>                     | 51 (77.3)                | 340 (83.3)          | 0.23      |
| <b>Income, N (%)</b>                       |                          |                     | 0.78      |
| <\$60K                                     | 13 (19.7)                | 71 (17.4)           |           |
| \$60K-<\$100K                              | 10 (15.2)                | 55 (13.5)           |           |
| >\$100K                                    | 9 (13.6)                 | 76 (18.6)           |           |

|                                                           |                  |                  |      |
|-----------------------------------------------------------|------------------|------------------|------|
| Unknown                                                   | 34 (51.5)        | 206 (50.5)       |      |
| <b>Physical activity level, median(Q1, Q3), MET-hr/wk</b> | 16.2 (7.3, 29.8) | 16.7 (7.0, 28.5) | 0.62 |
| <b>Alcohol consumption, N (%)</b>                         | 48 (72.7)        | 313 (76.7)       | 0.48 |
| <b>Smoking Status, N (%)</b>                              |                  |                  | 0.24 |
| Never                                                     | 52 (78.8)        | 328 (80.4)       |      |
| Past                                                      | 8 (12.1)         | 62 (15.2)        |      |
| Current                                                   | 6 (9.1)          | 18 (4.4)         |      |
| <b>Ever use hormone therapy, N (%)</b>                    | 18 (27.3)        | 82 (20.1)        | 0.19 |
| <b>Anti-Hypertensive medication use, N (%)</b>            | N=66             | N=408            | 0.62 |
| Never                                                     | 52 (78.8)        | 340 (83.3)       |      |
| Past                                                      | 5 (7.6)          | 21 (5.1)         |      |
| Current                                                   | 9 (13.6)         | 47 (11.5)        |      |
| <b>BMI, mean (SD), Kg/m<sup>2</sup></b>                   | 26.3 (4.3)       | 26.0 (4.3)       | 0.55 |
| <b>Waist circumference, mean (SD), cm</b>                 | 85.4 (11.1)      | 84.2 (11.8)      | 0.43 |
| <b>Systolic blood pressure, mean (SD), mmHg</b>           | 118.9 (14.2)     | 118.3 (15.3)     | 0.77 |
| <b>HDL cholesterol, mean (SD), mg/dL</b>                  | 70.7 (17.0)      | 72.4 (14.7)      | 0.39 |

|                                                       |                    |                    |      |
|-------------------------------------------------------|--------------------|--------------------|------|
| <b>LDL cholesterol, mean (SD), mg/dL</b>              | 113.5 (26.4)       | 111.1 (27.6)       | 0.51 |
| <b>Triglycerides, median (Q1, Q3), mg/dL</b>          | 80.0 (64.0, 131.0) | 68.0 (49.0, 103.0) | 0.01 |
| <b>Fasting glucose, median (Q1, Q3), mg/dL</b>        | 83.0 (73.0, 89.0)  | 78.0 (74.0, 85.0)  | 0.11 |
| <b>Insulin, median (Q1, Q3), <math>\mu</math>U/mL</b> | 5.1 (3.0, 9.7)     | 3.9 (1.0, 7.0)     | 0.01 |
| <b>HOMA, median (Q1, Q3)</b>                          | 1.1 (0.6, 1.9)     | 0.8 (0.2, 1.4)     | 0.01 |
| <b>EAT volume, median (Q1, Q3), cm<sup>3</sup></b>    | 41.6 (29.5, 60.3)  | 36.5 (25.4, 51.7)  | 0.20 |
| <b>PAT volume, median (Q1, Q3), cm<sup>3</sup></b>    | 16.7 (10.6, 21.3)  | 14.3 (10.2, 21.5)  | 0.23 |
| <b>Treatment groups, N (%)</b>                        |                    |                    | 0.93 |
| o-CEE                                                 | 20 (30.3)          | 123 (30.1)         |      |
| t-E2                                                  | 19 (28.8)          | 126 (30.9)         |      |
| Placebo                                               | 27 (40.9)          | 159 (39.0)         |      |

CAC: coronary artery calcification; MET: metabolic equivalents; BMI: body mass index; HDL: high density lipoprotein; LDL: low density lipoprotein; HOMA: Homeostasis Model Assessment insulin resistance index EAT: epicardial adipose tissue; PAT: paracardial adipose tissue; o-CEE: oral conjugated equine estrogen; t-E2: transdermal 17 $\beta$ -estradiol;

\* Baseline levels presented unless otherwise specified

†Chi-square test: for categorical variables, ANOVA or Wilcoxon Mann Whitney tests for continuous variables as appropriate

**Table S3. Multivariable logistic regression results of the association between the change in heart fat depots and CAC progression.**

| Change in heart fat depots | Model 1 *       |         | Model 2 †       |         |
|----------------------------|-----------------|---------|-----------------|---------|
|                            | OR (95% CIs) ‡  | P value | OR (95% CIs) ‡  | P value |
| <b>EAT change</b>          | 1.08(0.83,1.42) | 0.57    | 1.04(0.75,1.45) | 0.80    |
| <b>PAT change</b>          | 1.11(0.85,1.45) | 0.44    | 1.04(0.77,1.42) | 0.79    |

CAC: coronary artery calcification; MET: metabolic equivalents; BMI: body mass index; LDL-C: low density lipoprotein cholesterol;

EAT: epicardial adipose tissue; PAT: paracardial adipose tissue

\* Model 1: Adjusted for age, race (white vs. non-white) and study site (east, west and middle)

† Model 2: Model 1 + smoke, METs, education, triglycerides, LDL-C, anti-hypertensive medication, alcohol consumption, SBP, WC, treatment and baseline heart fat (EAT in model for EAT change and Pat in model for PAT change).

‡ OR represents the relative increase in the odds of CAC per 1 SD increase in the change of heart fat volume

**Table S4. Multivariable logistic regression results of the association between the change in heart fat depots and the CAC progression, by treatment.**

| Change in heart fat depots           | Treatment      | Model 1 *       |         |      | Model 2 †       |         |       |
|--------------------------------------|----------------|-----------------|---------|------|-----------------|---------|-------|
|                                      |                | OR (95% CIs) ‡  | P value |      | OR (95% CIs) ‡  | P value |       |
| EAT change                           | <b>o-CEE</b>   | 1.05(0.68,1.63) | 0.69    | ref  | 1.04(0.63,1.70) | 0.56    | ref   |
|                                      | <b>t-E2</b>    | 1.54(0.81,2.91) | 0.20    | 0.34 | 1.52(0.79,2.91) | 0.14    | 0.34  |
|                                      | <b>Placebo</b> | 0.94(0.63,1.39) | ref     | 0.69 | 0.86(0.55,1.35) | ref     | 0.56  |
| <b>EAT change*treatment P values</b> |                | 0.43            |         |      | 0.34            |         |       |
| PAT change                           | <b>o-CEE</b>   | 0.96(0.62,1.48) | 0.79    | ref  | 0.82(0.50,1.36) | 0.99    | ref   |
|                                      | <b>t-E2</b>    | 2.89(1.4,5.98)  | 0.005   | 0.01 | 2.73(1.29,5.75) | 0.007   | 0.008 |
|                                      | <b>Placebo</b> | 0.88(0.6,1.3)   | ref     | 0.79 | 0.82(0.52,1.27) | ref     | 0.99  |
| <b>PAT change*treatment P values</b> |                | 0.01            |         |      | 0.02            |         |       |

CAC: coronary artery calcification; MET: metabolic equivalents; BMI: body mass index; LDL-C: low density lipoprotein cholesterol;

EAT: epicardial adipose tissue; PAT: paracardial adipose tissue

\* Model 1: Adjusted for age, race (white vs. non-white) and study site (east, west and middle)

† Model 2: Model 1 + smoke, METs, education, triglycerides, LDL-C, anti-hypertensive medication, alcohol consumption, SBP, WC, treatment and baseline heart fat (EAT in model for EAT change and Pat in model for PAT change).

‡ OR represents the relative increase in the odds of CAC progression per 1 SD increase in the change of heart fat

**Table S5. IPW sensitivity analysis for odds ratio (95% CI) of any increase in heart fat depots over 48 months by treatment group.**

| Treatment      | Any increase after 48 month |         |                  |         |
|----------------|-----------------------------|---------|------------------|---------|
|                | EAT *                       |         | PAT †            |         |
|                | OR(95% CI)                  | P value | OR(95% CI)       | P value |
|                |                             |         | 0.06             |         |
| <b>o-CEE</b>   | 0.62(0.40, 0.97)            | 0.03    | 1.26(0.81, 1.97) | 0.30    |
| <b>t-E2</b>    | 0.99(0.64, 1.55)            | 0.99    | 1.20(0.77, 1.86) | 0.42    |
| <b>Placebo</b> | ----                        | ---     | ----             | ---     |

EAT: epicardial adipose tissue; PAT: paracardial adipose tissue; o-CEE: oral conjugated

equine estrogen; t-E2: transdermal 17 $\beta$ -estradiol

\* EAT: o-CEE vs. t-E2; OR(95% CI): 0.62(0.39, 0.99), P=0.02

† PAT: o-CEE vs. t-E2; OR(95% CI): 1.05(0.66, 1.68), P=0.49

**Table S6. IPW sensitivity analysis of the association between the change in heart fat depots and CAC progression from multivariable logistic regression.**

| Change in heart fat depots | Model 1 *        |         | Model 2 †        |         |
|----------------------------|------------------|---------|------------------|---------|
|                            | OR (95% CIs) ‡   | P value | OR (95% CIs) ‡   | P value |
| <b>EAT change</b>          | 1.11 (0.83,1.49) | 0.48    | 1.06 (0.75,1.50) | 0.73    |
| <b>PAT change</b>          | 1.09 (0.82,1.44) | 0.55    | 1.01 (0.73,1.40) | 0.95    |

CAC: coronary artery calcification; MET: metabolic equivalents; BMI: body mass index; LDL-C: low density lipoprotein cholesterol;

EAT: epicardial adipose tissue; PAT: paracardial adipose tissue

\* Model 1: Adjusted for age, race (white vs. non-white) and study site (east, west and middle)

† Model 2: Model 1 + smoke, METs, education, triglycerides, LDL-C, anti-hypertensive medication, alcohol consumption, SBP, WC, treatment and baseline heart fat (EAT in model for EAT change and Pat in model for PAT change).

‡ OR represents the relative increase in the odds of CAC progression per 1 SD increase in the change of heart fat volume

**Table S7. IPW sensitivity analysis of the association between the change in heart fat depots and the CAC progression from multivariable logistic regression, by treatment.**

| Change in heart fat depots           | Treatment      | Model 1 *         |         |       | Model 2 †        |         |       |
|--------------------------------------|----------------|-------------------|---------|-------|------------------|---------|-------|
|                                      |                | OR (95% CIs) ‡    | P value |       | OR (95% CIs) ‡   | P value |       |
| EAT change                           | <b>o-CEE</b>   | 1.01 (0.63,1.64)  | 0.99    | ref   | 0.98 (0.58,1.68) | 0.86    | ref   |
|                                      | <b>t-E2</b>    | 1.48 (0.78,2.83)  | 0.33    | 0.35  | 1.49 (0.77,2.87) | 0.23    | 0.32  |
|                                      | <b>Placebo</b> | 1.01 (0.66, 1.55) | ref     | 0.99  | 0.92 (0.57,1.49) | ref     | 0.86  |
| <b>EAT change*treatment P values</b> |                | 0.58              |         |       | 0.47             |         |       |
| PAT change                           | <b>o-CEE</b>   | 0.91 (0.56,1.48)  | 0.81    | ref   | 0.74 (0.44,1.27) | 0.89    | Ref   |
|                                      | <b>t-E2</b>    | 2.91 (1.39,6.10)  | 0.004   | 0.009 | 2.68 (1.26,5.74) | 0.007   | 0.006 |
|                                      | <b>Placebo</b> | 0.85 (0.57,1.26)  | ref     | 0.81  | 0.78 (0.48,1.26) | ref     | 0.89  |
| <b>PAT change*treatment P values</b> |                | 0.01              |         |       | 0.01             |         |       |

CAC: coronary artery calcification; MET: metabolic equivalents; BMI: body mass index; LDL-C: low density lipoprotein cholesterol;

EAT: epicardial adipose tissue; PAT: paracardial adipose tissue

\* Model 1: Adjusted for age, race (white vs. non-white) and study site (east, west and middle)

† Model 2: Model 1 + smoke, METs, education, triglycerides, LDL-C, anti-hypertensive medication, alcohol consumption, SBP, WC, treatment and baseline heart fat (EAT in model for EAT change and Pat in model for PAT change).

‡ OR represents the relative increase in the odds of CAC progression per 1 SD increase in the change of heart fat
